# Supplementary material
Source: PubMed Central journal article supplement (PMC7905702)
Supplement: jamacardiol-e210038-s003.pdf [file jamacardiol-e210038-s003.pdf]

## Data Sharing Statement

Gladstone. Screening for Atrial Fibrillation in the Older Population.  
*JAMA Cardiol.* Published February 24, 2021.  
doi:10.1001/jamacardio.2021.0038

### Data

**Data available:** Yes

**Data types:** Deidentified participant data

**How to access data:** Requests for data should be sent to  
[Jeff.Healey@phri.ca](mailto:Jeff.Healey@phri.ca)

**When available:** beginning date: 07-01-2021

### Supporting Documents

**Document types:** None

### Additional Information

**Who can access the data:** For researchers whose proposed use of the data has been approved.

**Types of analyses:** For approved study proposals.

**Mechanisms of data availability:** After approval of a study proposal.
